# Supplementary material
Source: MDPI journal article supplement (https://www.mdpi.com/2571-6131/5/3/27)
Supplement: s1 [file s1]

# Supplementary Information

## Photonic sintering of oxide ceramic films: effect of colored $\text{Fe}_x\text{O}_y$ nanoparticle pigments

**Evgeniia Gilshtein <sup>1,\*</sup>, Stefan Pfeiffer <sup>2</sup>, Severin Siegrist <sup>1</sup>, Vitor Vlnieska <sup>1</sup>, Thomas Graule <sup>2</sup> and Yaroslav E. Romanyuk <sup>1</sup>**

<sup>1</sup> Laboratory for Thin Films and Photovoltaics, Empa - Swiss Federal Laboratories for Materials Science and Technology, Überlandstrasse 129, 8600, Dübendorf, Switzerland;

<sup>2</sup> Laboratory for High Performance Ceramics, Empa - Swiss Federal Laboratories for Materials Science and Technology, Überlandstrasse 129, 8600, Dübendorf, Switzerland;

\*Correspondence: [evgeniia.gilshtein@empa.ch](mailto:evgeniia.gilshtein@empa.ch)

**Keywords:** ceramic coating; flash lamp annealing; photonic sintering; iron oxide nanoparticle pigments

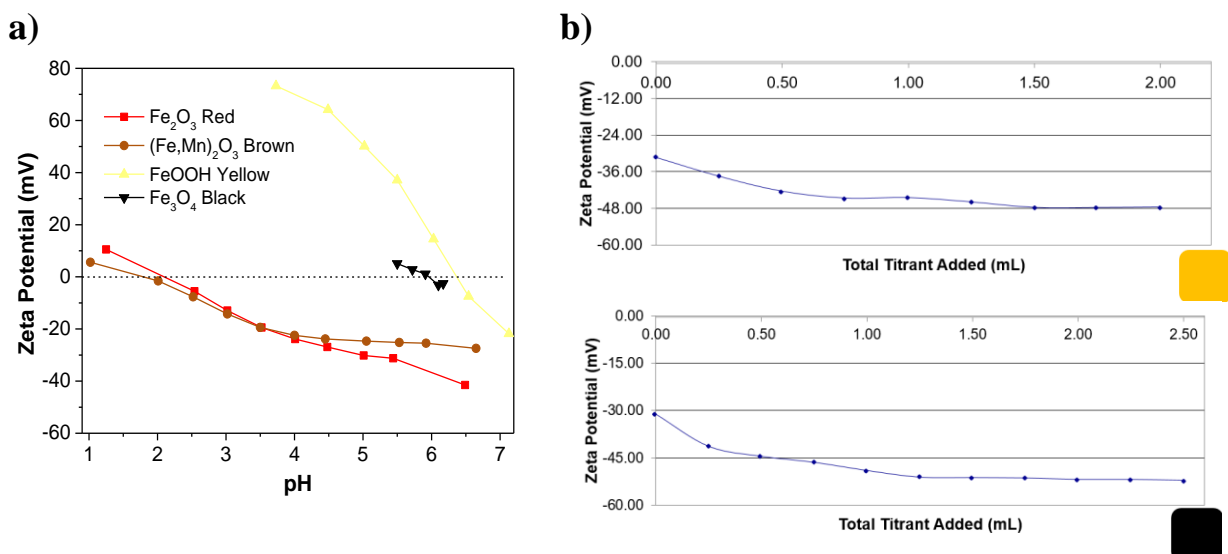

**Figure S1.** Zeta potential a) of all colored Fe<sub>x</sub>O<sub>y</sub> nanoparticle pigments in water, b) dependence on the amount of added titrant (ammonium citrate).

**Table S1.** Absolute density and specific surface area (SSA) of raw powders measured by helium pycnometry and BET measurements, respectively, and calculated BET average particle sizes for all powders.

|                                                      | absolute density<br>[g/cm <sup>3</sup> ] | SSA<br>[m <sup>2</sup> /g] | BET average particle size<br>[nm] |
|------------------------------------------------------|------------------------------------------|----------------------------|-----------------------------------|
| μm-Al <sub>2</sub> O <sub>3</sub> (AA3)              | 4.0                                      | 0.4                        | 3756                              |
| nm-Al <sub>2</sub> O <sub>3</sub> (TM-DAR)           | 3.9                                      | 11.8                       | 129                               |
| α-Fe <sub>2</sub> O <sub>3</sub> (Bayferrox Red 110) | 5.0                                      | 15.2                       | 104                               |

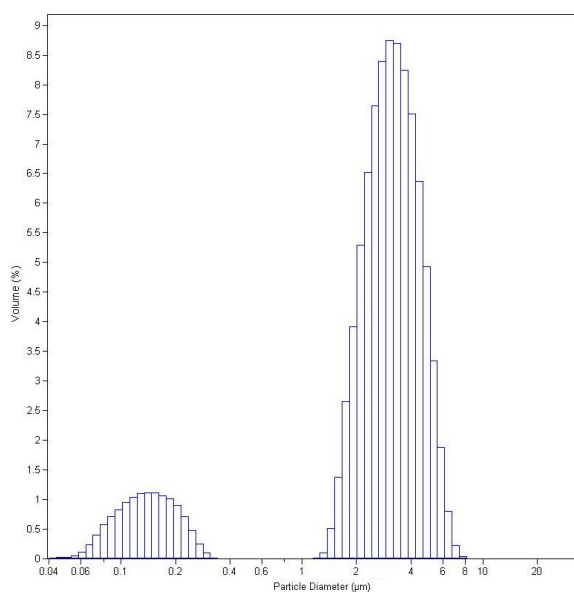

**Figure S2.** Volume-based LD particle size distribution of Red Al<sub>2</sub>O<sub>3</sub>:Fe<sub>2</sub>O<sub>3</sub> ceramic slurry in water dispersed by means of ammonium citrate. The first broad peak corresponds to the mixture of nm-Al<sub>2</sub>O<sub>3</sub> and nm-Fe<sub>2</sub>O<sub>3</sub>, while the second peak – to the μm-Al<sub>2</sub>O<sub>3</sub>.

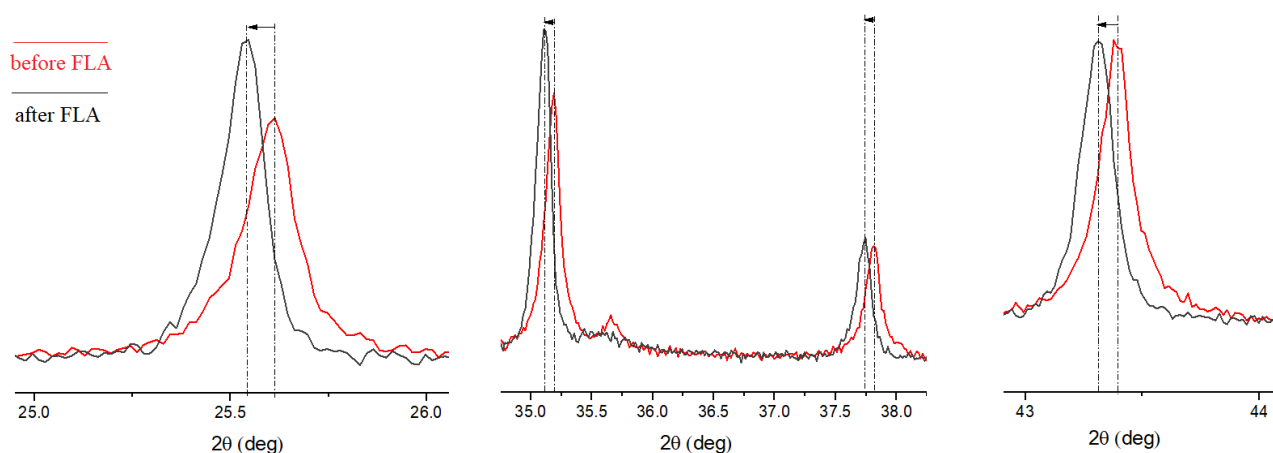

**Figure S3.** Enlarged XRD pattern peaks (from Fig. 4a) – (1 0 -2), (0 1 -4), (1 -2 0), and (2 -1 -3) - indicating the small shift of the corundum peaks by  $1^\circ 2\theta$ .

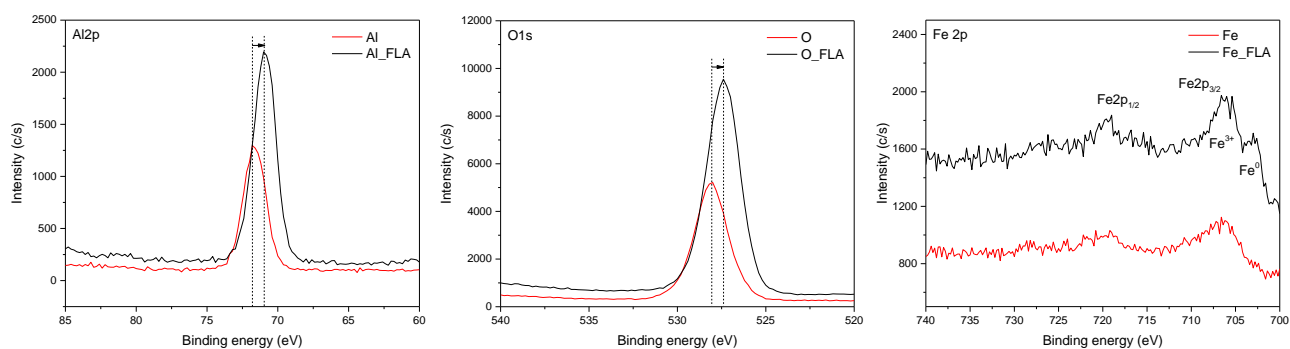

**Figure S4.** Al 2p, Fe 2p, and O 1s XPS peaks of the Red  $\text{Al}_2\text{O}_3\text{:Fe}_2\text{O}_3$  layers samples before and after FLA. Al and O peaks indicate a shift towards lower binding energies for the samples after FLA.

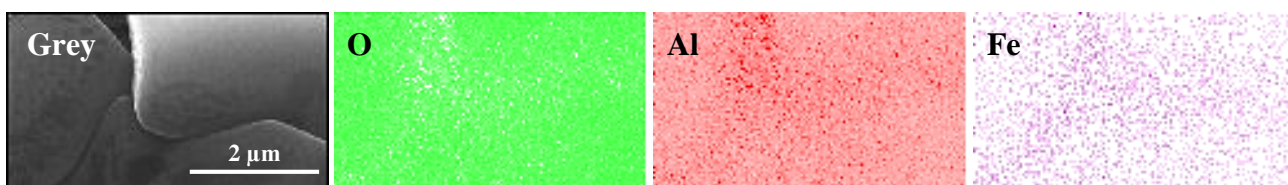

**Figure S5.** EDX maps of the grains interconnection for the FLA-sintered Red  $\text{Al}_2\text{O}_3\text{:Fe}_2\text{O}_3$  layer.

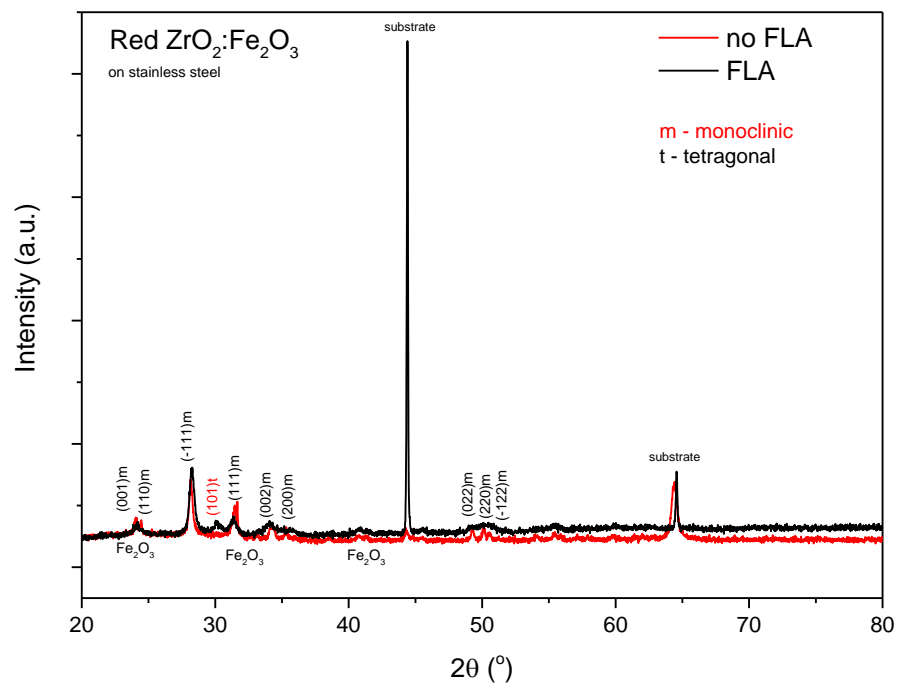

**Figure S6.** Indexed XRD patterns of the ceramic Red  $\text{ZrO}_2\text{:Fe}_2\text{O}_3$  ceramic film before and after FLA.

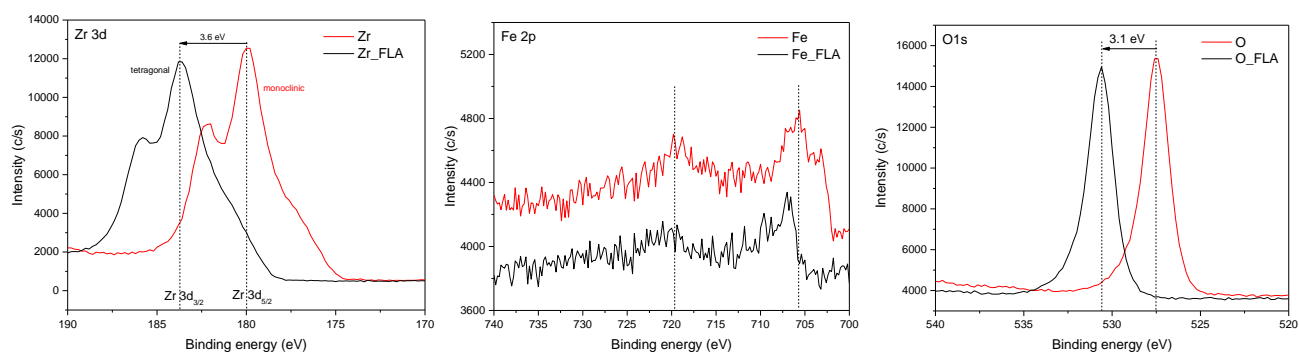

**Figure S7.** Zr 3d, Fe 2p, and O 1s XPS peaks of the Red  $\text{ZrO}_2\text{:Fe}_2\text{O}_3$  layers samples before and after FLA. Zr and O peaks indicate a shift towards higher binding energies for the samples after FLA.
